# Supplementary material for: Unexpected origin of magnetism in monoclinic Nb12O29 from first-principles calculations
Source: Royal Society of Chemistry journal article supplement (doi:10.1039/c4tc02222j), 2014-11-19

– Electronic Supplementary Information –

**Unexpected origin of the magnetism in monoclinic Nb<sub>12</sub>O<sub>29</sub>  
from first-principles calculations**

C. M. Fang<sup>1,2,\*</sup>, M.A. van Huis<sup>2,1</sup>, Q. Xu<sup>1</sup>, R.J. Cava<sup>3</sup>, and H.W. Zandbergen<sup>1</sup>

<sup>1</sup>Kavli Institute of Nanoscience, Delft University of Technology, Lorentzweg 1, NL-2628 CJ Delft, The Netherlands.

<sup>2</sup>Debye Institute for Nanomaterials Science, Center for Extreme Matter and Emergent Phenomena, Utrecht University, Princetonplein 5, NL-3584 CC Utrecht, The Netherlands.

<sup>3</sup>Department of Chemistry, Princeton University, Princeton, New Jersey 08544, USA.

Table S1. Calculated fractional coordinates of atoms at the Wyckoff sites in the unit cells listed in Table 1 of the main text. The interatomic distances (bonds lengths), bond-valences (V) and the number of 4d electrons in the Nb spheres (N(e)) of the Nb atoms are listed. The local magnetic moments (M) are also included. The doublet Nb-O bonds are along the *b*-axis (Figure S1).

| Atom                      | site | x/a, y/b, z/c       | Bond lengths (Å)                                 | V(v.u.)/<br>N(e) | M (μ <sub>B</sub> ) |
|---------------------------|------|---------------------|--------------------------------------------------|------------------|---------------------|
| <b>Orthorhombic phase</b> |      |                     |                                                  |                  |                     |
| Nb1                       | 8f   | 0.0507, 0.0, 0.0362 | -O: 1.79, 1.89, 2.00(×2),<br>2.30, 2.41          | +4.77/<br>1.22   | /0.00               |
| Nb2                       | 8f   | 0.0505, 0.0, 0.6687 | -O: 1.79, 1.85, 2.02(×2),<br>2.27, 2.34          | +4.82/<br>1.23   | /0.00               |
| Nb3                       | 8f   | 0.0484, 0.0, 0.8514 | -O: 1.76, 2.00, 2.00(×2),<br>2.14, 2.49          | +4.68/<br>1.23   | /0.00               |
| Nb4                       | 8f   | 0.1849, 0.0, 0.0336 | -O: 1.83, 1.91, 1.99 (×2),<br>2.14, 2.28         | +4.88/<br>1.18   | /0.00               |
| Nb5                       | 8f   | 0.1845, 0.0, 0.6675 | -O: 1.83, 1.92, 1.99(×2),<br>2.13, 2.28          | +4.87/<br>1.18   | /0.00               |
| Nb6                       | 8f   | 0.1848, 0.0, 0.8508 | -O: <b>1.91</b> , 1.94 (×2), 2.01,<br>2.02, 2.23 | +4.92/<br>1.13   | /0.00               |
| <b>Monoclinic phase</b>   |      |                     |                                                  |                  |                     |
| Nb1                       | 4i   | 0.1019,0.0, 0.0667  | -O: 1.79, 1.89, 2.00(×2),<br>2.30, 2.42          | +4.77<br>/ 1.22  | / 0.01              |
| Nb2                       | 4i   | 0.3709, 0.0, 0.1445 | -O: 1.83, 1.91, 1.99(×2),<br>2.15, 2.28          | +4.87<br>/ 1.18  | / 0.05              |
| Nb3                       | 4i   | 0.0968, 0.0, 0.8804 | -O: 1.76, 2.00, 2.01(×2),<br>2.14, 2.49          | +4.72<br>/ 1.23  | / 0.02              |
| Nb4                       | 4i   | 0.3695, 0.0, 0.9613 | -O: <b>1.91</b> , 1.94(×2), 2.01<br>2.02, 2.25   | +4.90<br>/ 1.14  | / 0.10              |
| Nb5                       | 4i   | 0.1005, 0.0, 0.6988 | -O: 1.80, 1.85, 2.02(×2),<br>2.27, 2.33          | +4.82<br>/ 1.22  | / 0.02              |
| Nb6                       | 4i   | 0.3679, 0.0, 0.7774 | -O: 1.83, 1.92, 1.99(×2),<br>2.12, 2.29          | +4.88<br>/ 1.18  | / 0.06              |

Figure S1. Schematic coordinations of several  $\text{NbO}_6$  octahedrons belonging to (a) the magnetic  $\text{Nb}4$  atoms and (b) the non-spin-polarized  $\text{Nb}1$  atoms in m-phase, and (c) the  $\text{Nb}6$  atoms in the o-phase of  $\text{Nb}_{12}\text{O}_{29}$ .

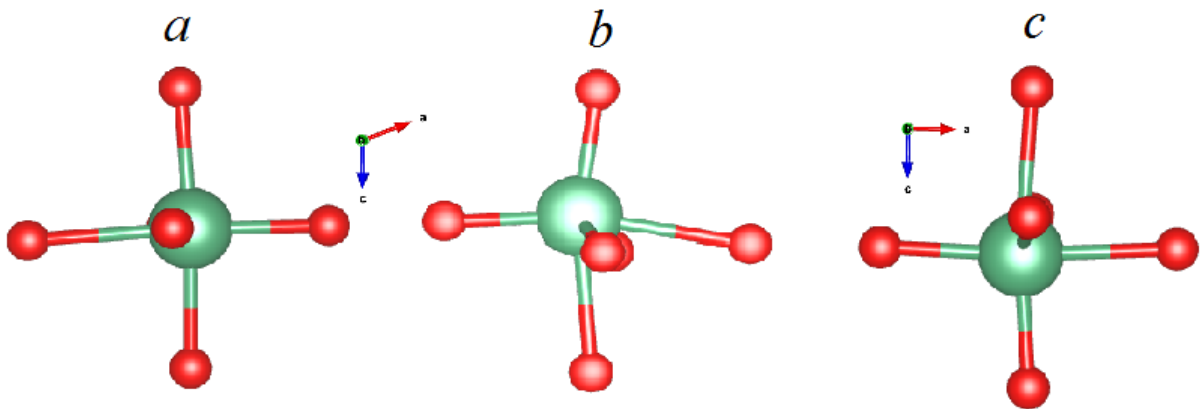

Figure S2. The isosurfaces of spin-density for m- $\text{Nb}_{12}\text{O}_{29}$  viewed along the (010) axis (a), and in perspective view (b). The green large spheres represent Nb atoms, and small red spheres O atoms. The spin-density for the Nb 4d orbitals is displayed in yellow. [[[MvH: specify also the blue]]].

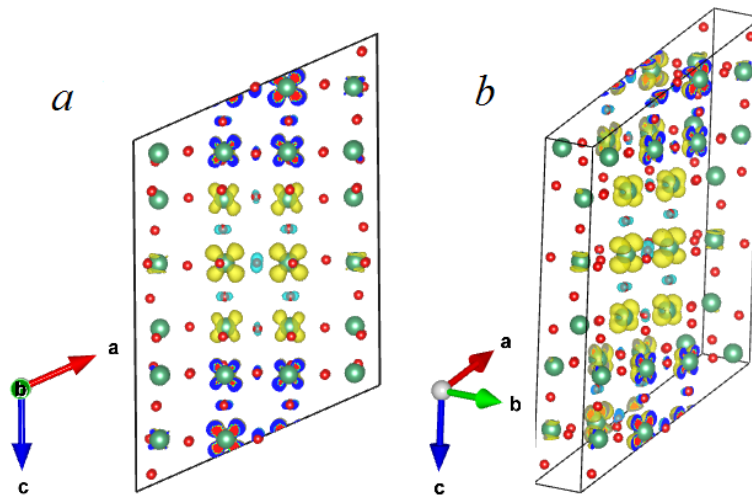

Supplement: c4tc02222j1.pdf [file c4tc02222j1.pdf]
